# Supplementary material
Source: MDPI journal article supplement (https://www.mdpi.com/2073-4433/12/12/1578)
Supplement: s1 [file s1]

Supplementary Materials: Supplementary Figures

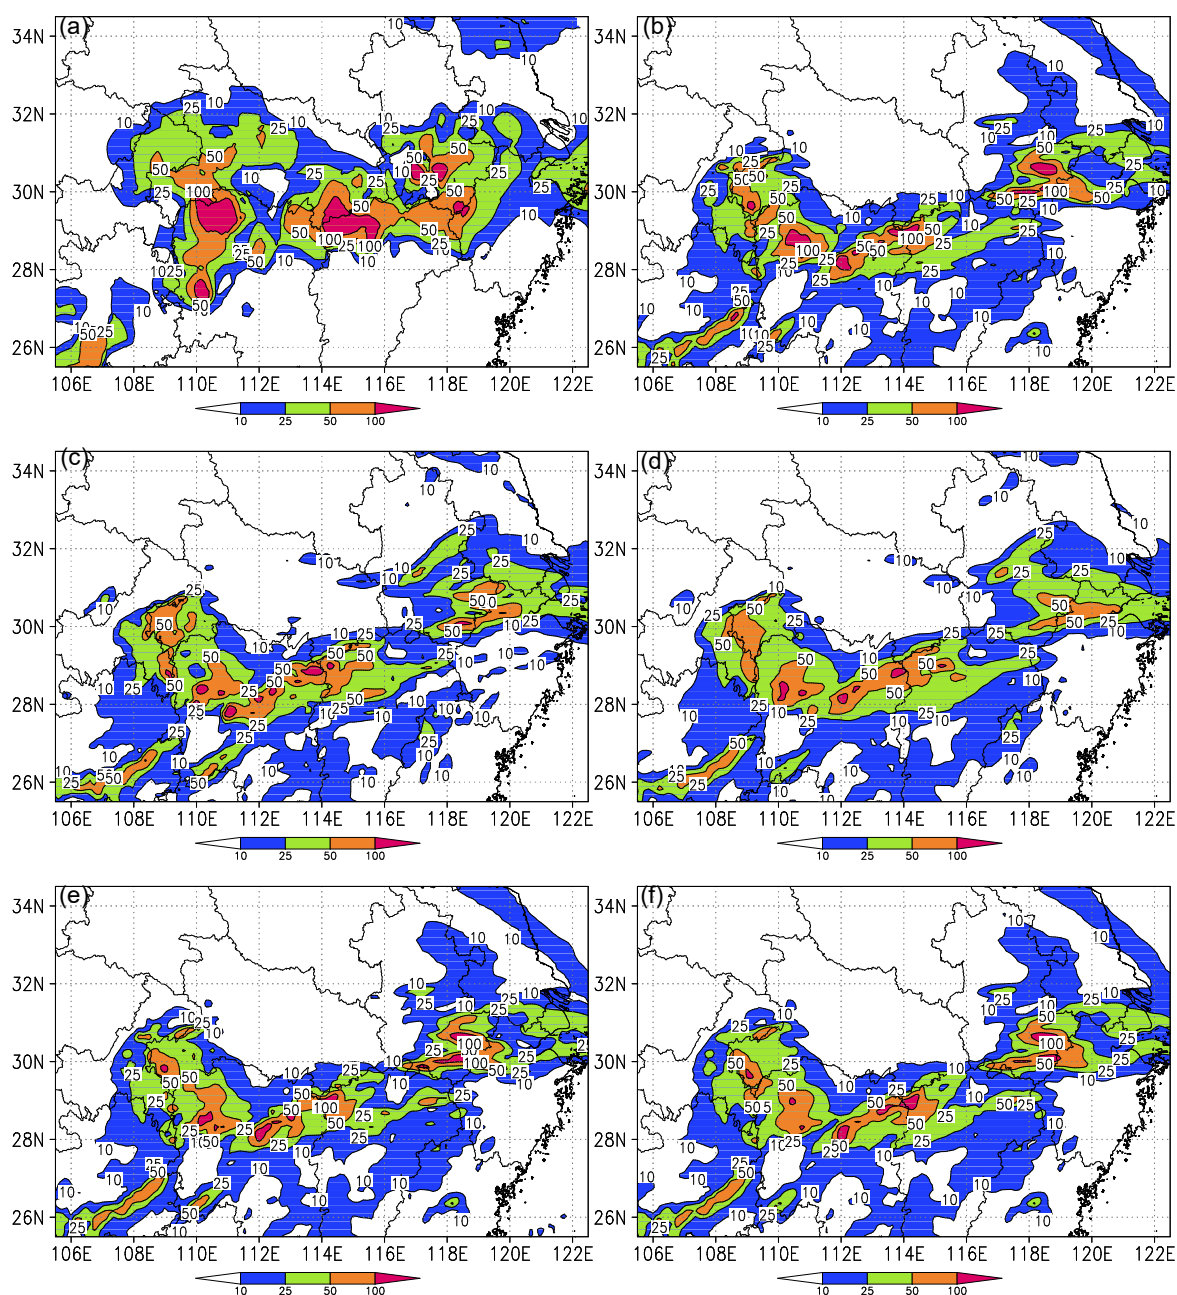

**Figure S1.** Spatial distribution of the 24 h accumulated precipitation (unit: mm): (a) observation; (b) control test; (c) Test ATM12; (d) ATM subset average; (e) Test LSM2; and (f) LSM subset average.

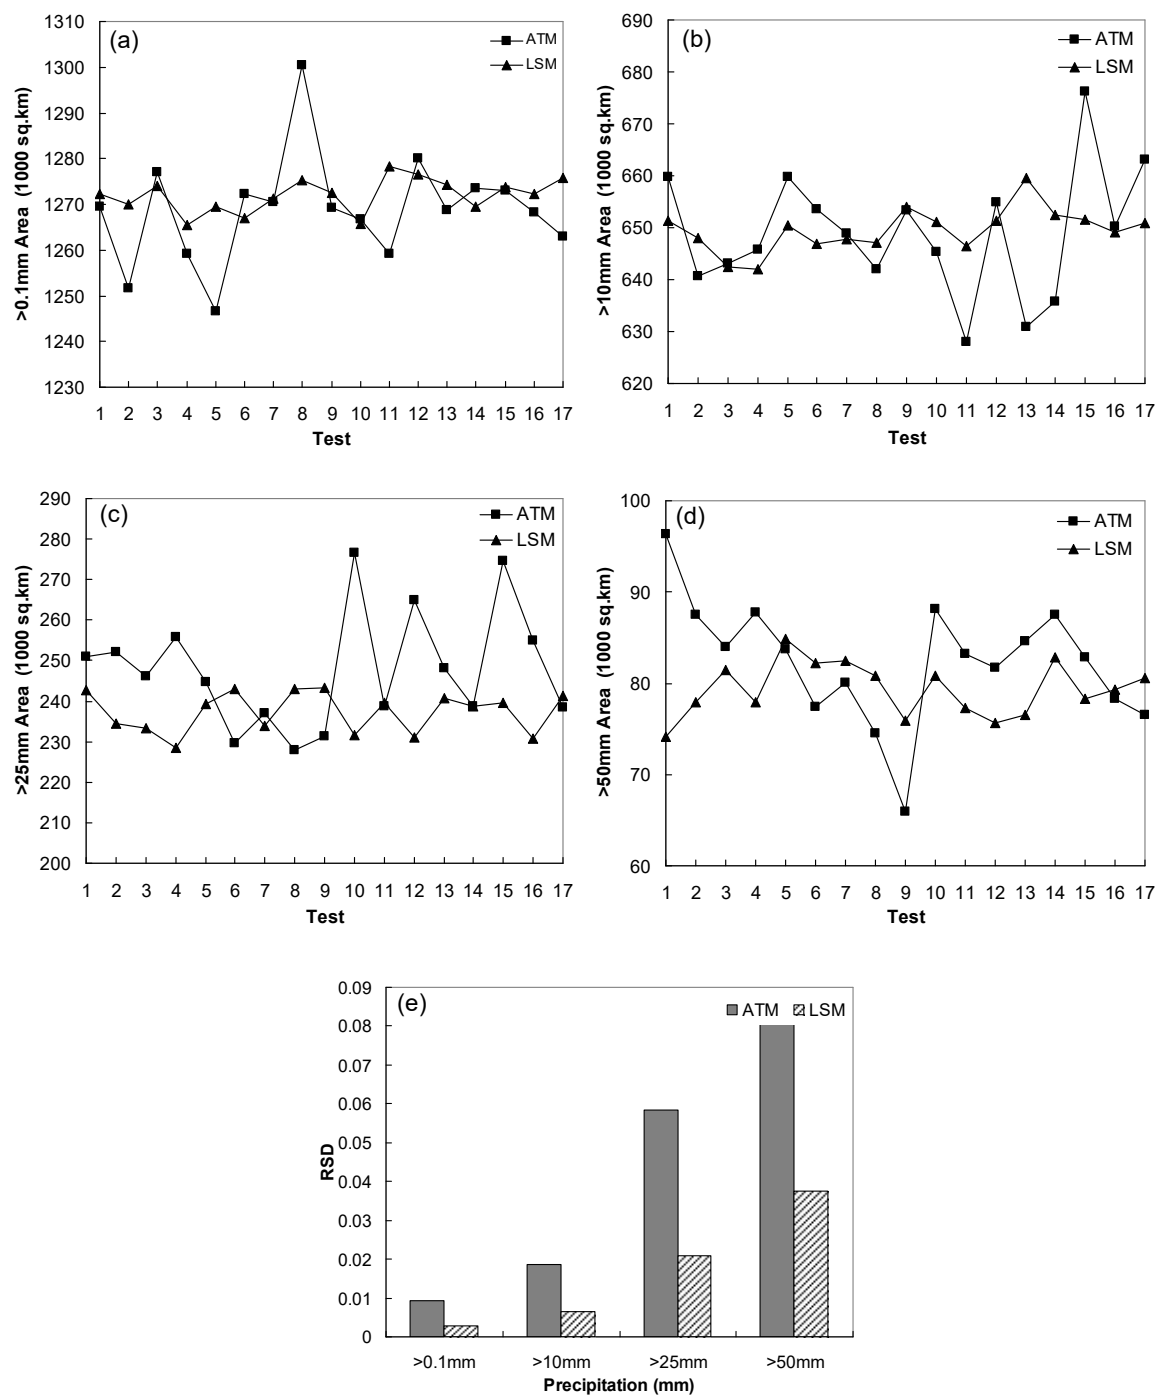

**Figure S2.** The total precipitation area (unit:  $10^3 \text{ km}^2$ ) and its relative difference (unit: %) in standard deviation for various precipitation intensities: (a) area of >0.1mm precipitation; (b) area of >10mm precipitation; (c) area of >25mm precipitation; (d) area of >50mm precipitation; and (e) relative difference in standard deviation (RSD).

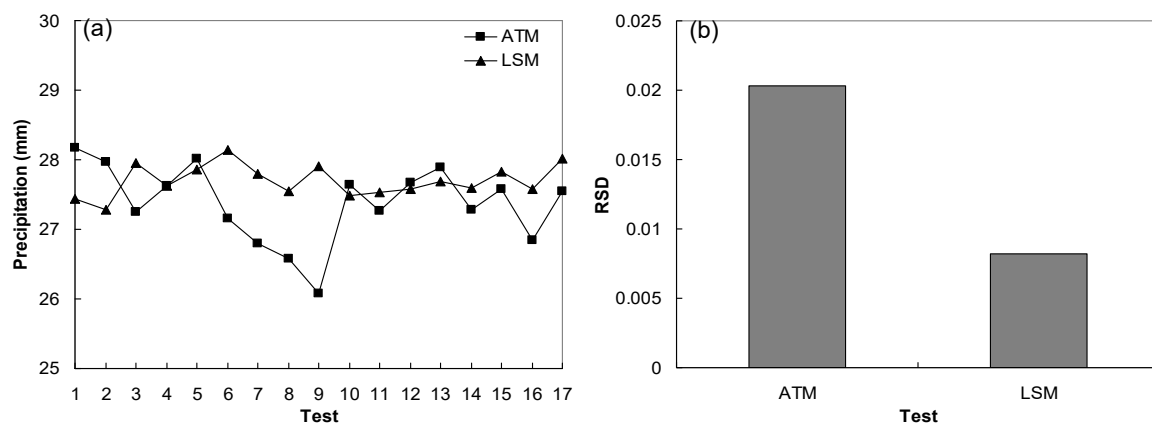

**Figure S3.** As Figure S2, but (a) for the average value of the precipitation area (Domain D<sub>2</sub>; Figure 1) and (b) for its relative difference (unit: %) in standard deviation.

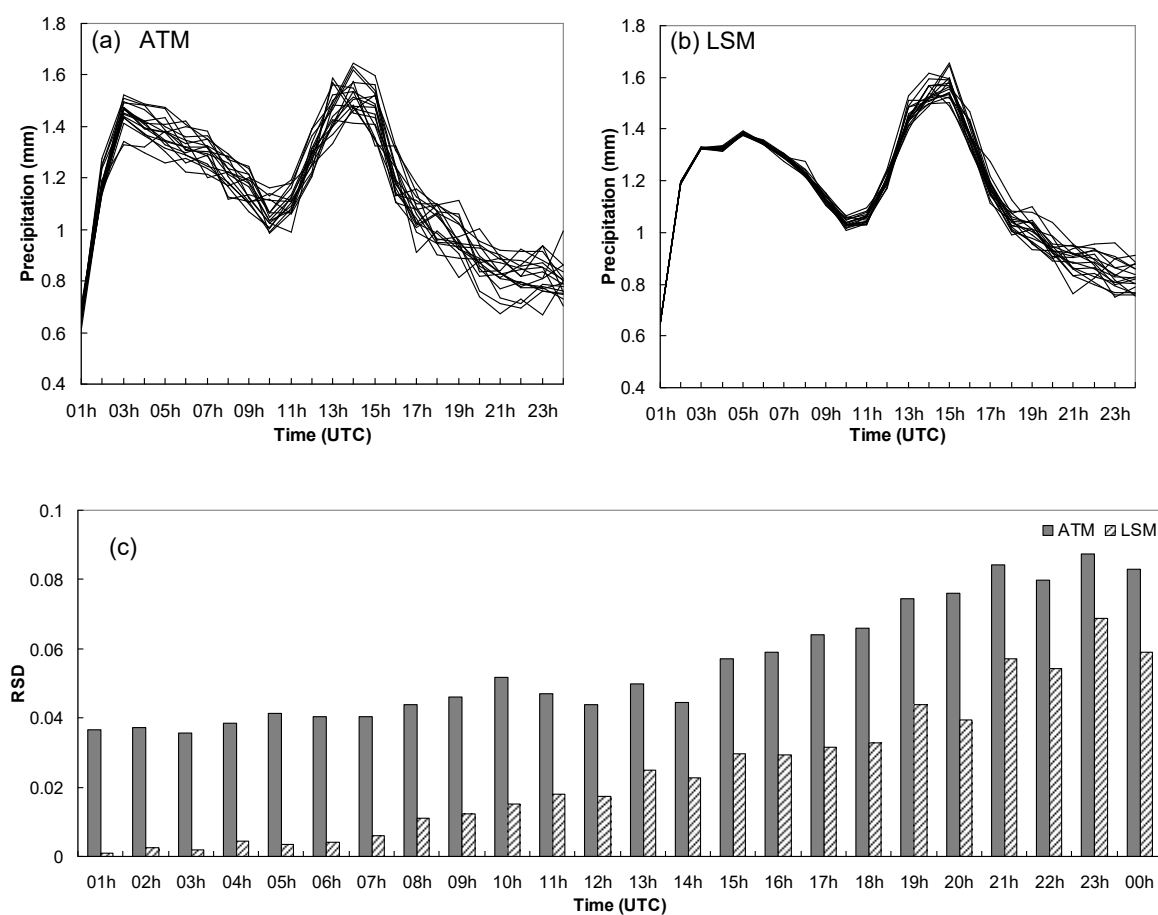

**Figure S4.** Time series of Domain D<sub>2</sub>-averaged hourly precipitation (a: ATM subset; b: LSM subset) and its relative difference (unit: %) in standard deviation.

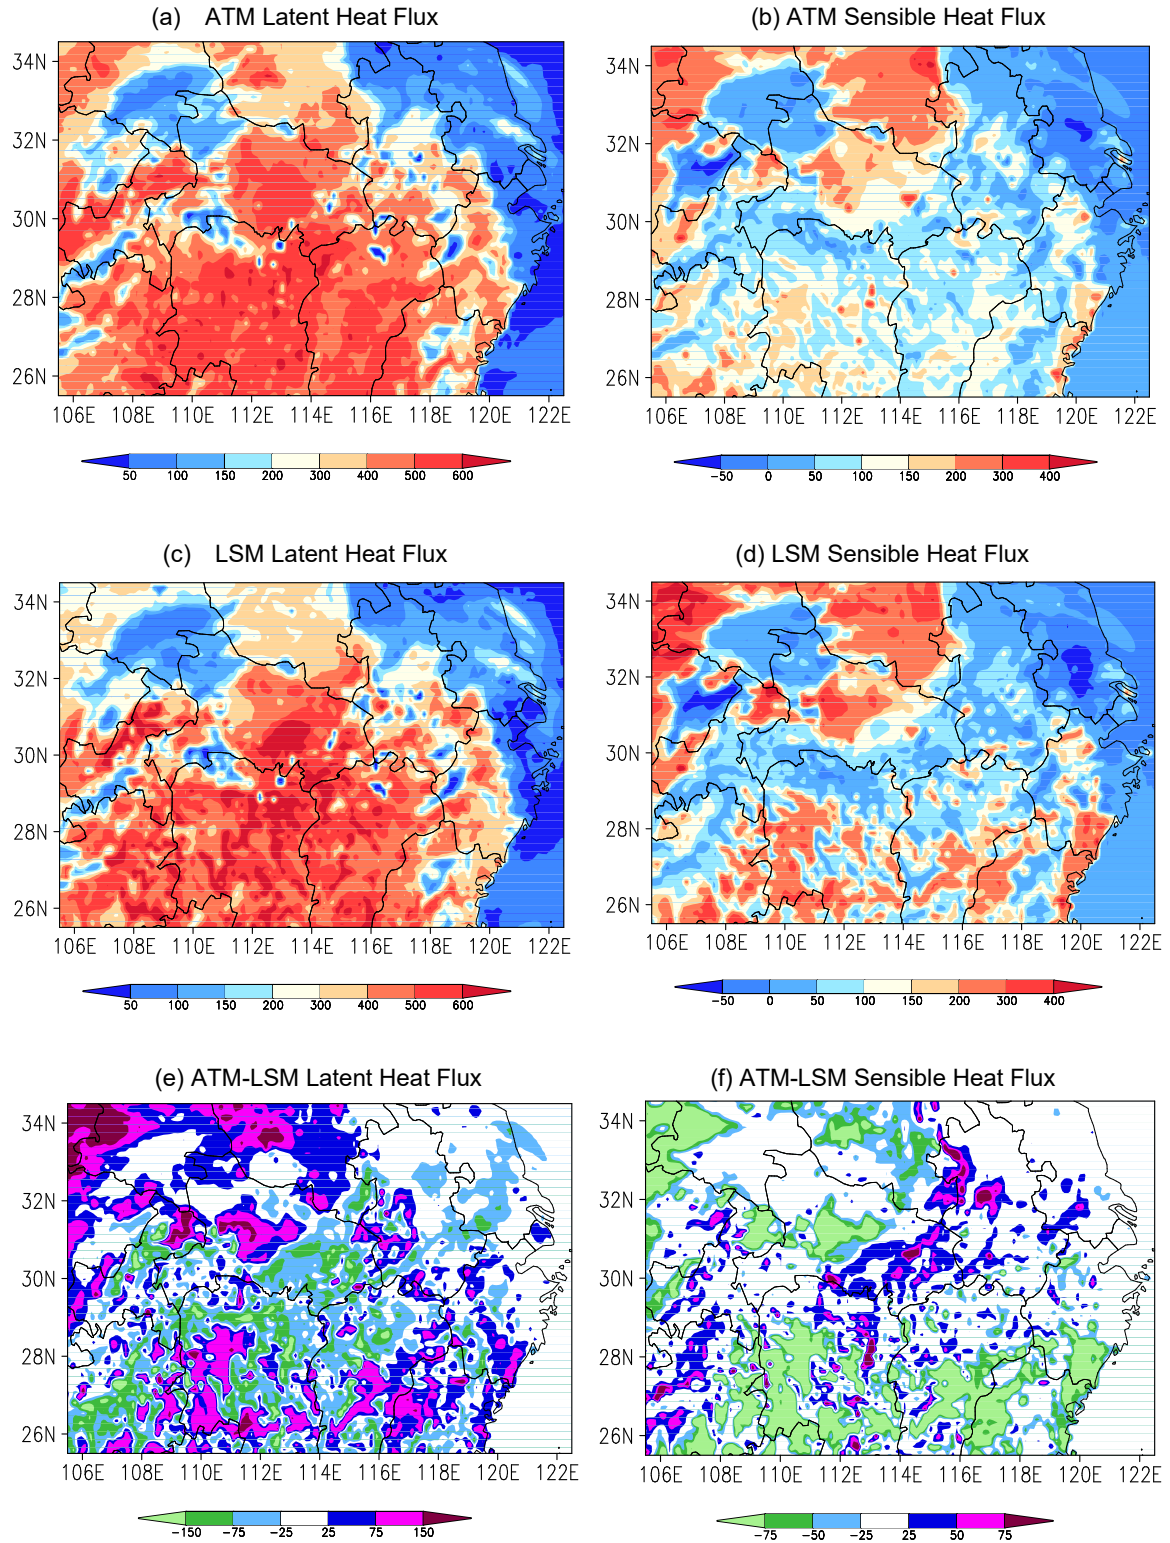

**Figure S5.** Latent (left) and sensible (right) heat fluxes simulated for 06:00 h on 31 May 2007 by the ATM and LSM subsets (unit:  $\text{W m}^{-2}$ ), where (a)-(d) denote the ATM latent, ATM sensible, LSM latent, and LSM sensible heat fluxes, respectively, and (e)-(f) represent the ATM minus LSM latent and sensible heat fluxes, respectively.
